# Supplementary material
Source: Springer Nature journal article supplement (https://www.springermedizin.de/resource/supplementary/12948_2011_102_MOESM2_ESM.pdf/9556910)

# ROC curves

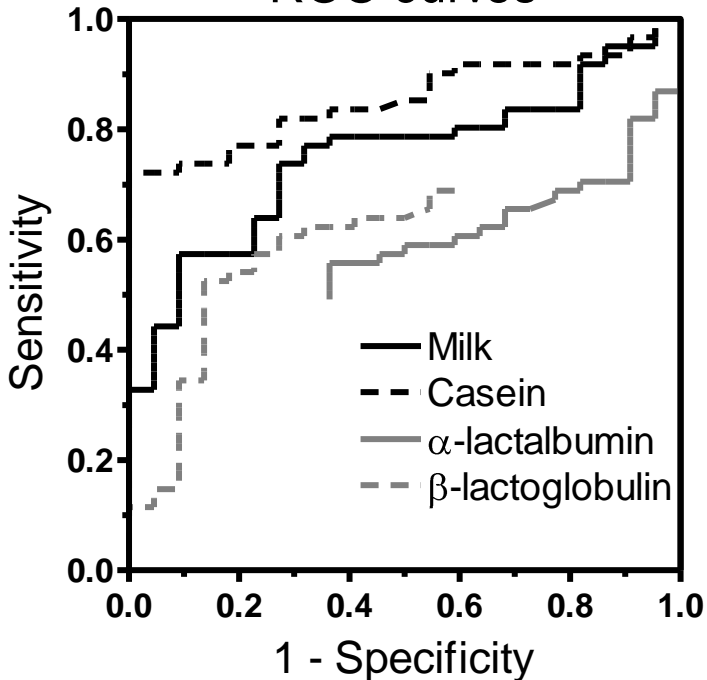

Supplement: MOESM2 [file 9556910]
